# Supplementary material for: Population-Based Pertussis Incidence and Risk Factors in Infants Less Than 6 Months in Nepal
Source: PubMed Central journal article supplement (PMC5907881; doi:10.1093/jpids/piw079), 2017-01-10
Supplement: piw079_suppl_supplementary_figure_1.pdf [file piw079_suppl_supplementary_figure_1.pdf]

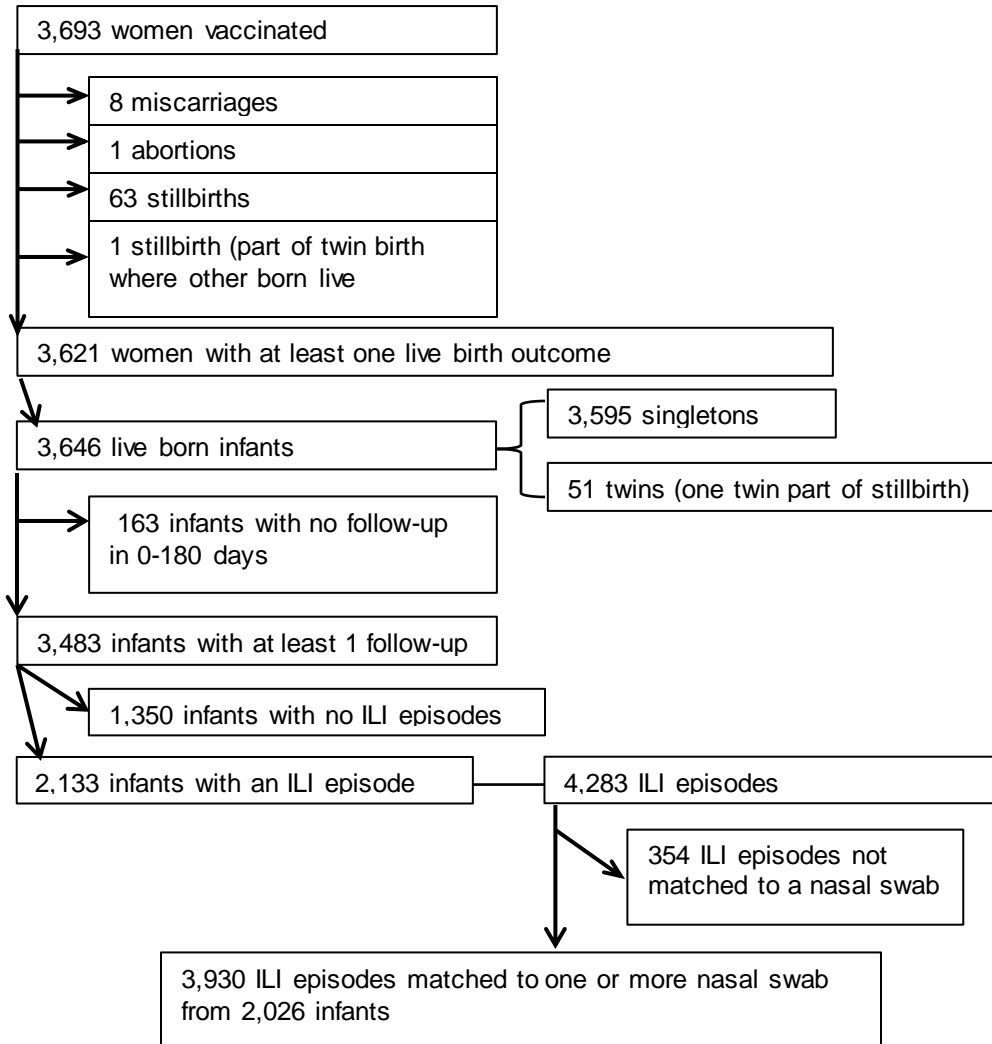

Supplementary Figure 1
